# Supplementary material for: Transglutaminase-Mediated Semen Coagulation Controls Sperm Storage in the Malaria Mosquito
Source: PLOS journal article supplement (doi:10.1371/journal.pbio.1000272), 2009-12-21
Supplement: S1 (10.1371/journal.pbio.1000272.s001) [file journal.pbio.1000272.s001]

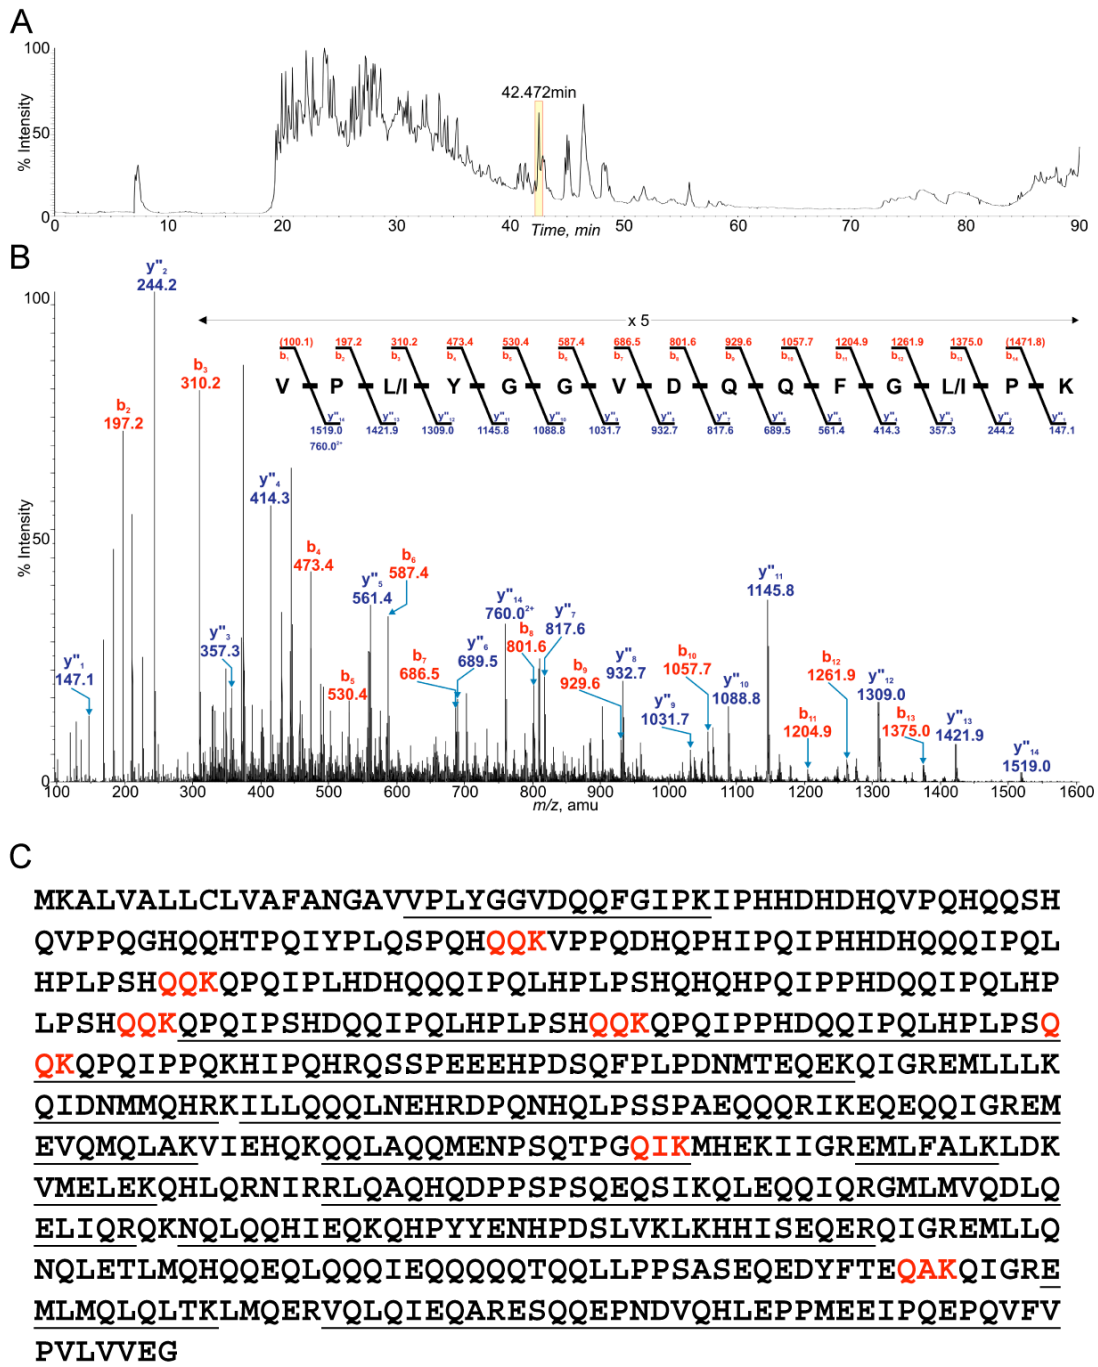

**Supplementary Fig. 1. The Plugin protein.** **A.** An example of the nano LC-MS data created in this study. The total ion current trace across the nanoLC chromatogram over 90mins in the analysis of SDS PAGE band 13 of a MAG sample (gel Mr ~70kD), highlighting the region at 42.4 mins for subsequent on-line MS/MS analysis. **B.** Elucidation of the true N-terminus of the

mature Plugin protein: The data-dependent acquisition of an MS/MS spectrum of a doubly charged quasimolecular ion,  $m/z$  809.6<sup>2+</sup>, elution time 42.4mins mins, sequenced as VPL/IYGGVDQQFGL/IPK. A weaker signal at  $m/z$  859.1<sup>2+</sup> from the data set is assigned as the same sequence with an additional N-terminal Valine. The predicted signal sequence, residues 1-16, for the Plugin protein would suggest an N-terminus beginning at Ala-17 of Ala-Val-Val Pro..... for the expressed product. The experimental data show that the major processing event leads to an N-terminus beginning at Val-19 for the Plugin protein. **C.** The complete amino acid sequence of Plugin. The Plugin sequence was determined using a combination of mass spectrometric and molecular biological methods. The 5' end was elucidated using the FirstChoice RLM-RACE Kit (Ambion) according to the manufacturers instructions, starting with primers against the genomic region matching initial peptides identified by mass spec analysis which provided over 50% (underlined) sequence coverage (outer primer: 5'-TGCCTAGTTGCTGCTTTTGGT-3'; inner primer: 5'-GCTGCTCCTGCTCCTTGATCCT-3'). The 3' end of the gene was identified by designing primers against *ab initio* predictions in the region, and sequencing the resulting RT-PCR products until an in-frame stop codon was identified. Putative transglutamination sites are highlighted in red. The sequence from residues 19-234 is predicted to be intrinsically disordered.
